# Supplementary material
Source: publisher figshare collection journal article supplement (https://asha.figshare.com/articles/dataset/_/7646717)
Supplement: Supplementary file 2 [file 2]

**Supplemental Material S1.** Secondary sources referring to multimodal treatments.

| <b>Paper</b>                                                                                                                                                                                                                                                                                          | <b>Terms used</b>                                                                          |
|-------------------------------------------------------------------------------------------------------------------------------------------------------------------------------------------------------------------------------------------------------------------------------------------------------|--------------------------------------------------------------------------------------------|
| ASHA. (2016). <i>Summary of the Clinical Practice Guideline - Australian Aphasia Rehabilitation Pathway</i> . Retrieved October 28, 2017, from <a href="https://www.asha.org/articlesummary.aspx?id=8589971309">https://www.asha.org/articlesummary.aspx?id=8589971309</a>                            | Multimodal treatment, used as a keyword for this Clinical Practice Guideline (CPG) summary |
| ASHA. (n.d.). <i>Aphasia - ASHA practice portal</i> . Retrieved October 28, 2017, from <a href="https://www.asha.org/PRPSpecificTopic.aspx?folderid=8589934663&amp;section=Treatment">https://www.asha.org/PRPSpecificTopic.aspx?folderid=8589934663&amp;section=Treatment</a>                        | Multimodal treatment, used as a keyword for this CPG summary                               |
| ASHA. (n.d.). <i>Summary of the Clinical Practice Guideline - National Stroke Foundation Clinical Guidelines for Stroke Management</i> . Retrieved October 29, 2017, from <a href="https://www.asha.org/articlesummary.aspx?id=8589960979">https://www.asha.org/articlesummary.aspx?id=8589960979</a> | Multimodal treatment, used as a keyword for this CPG summary                               |
| ASHA. (n.d.). <i>Summary of the Clinical Practice Guideline - New Zealand Clinical Guidelines for Stroke Management</i> . Retrieved October 29, 2017, from <a href="https://www.asha.org/articlesummary.aspx?id=8589960475">https://www.asha.org/articlesummary.aspx?id=8589960475</a>                | Multimodal treatment, used as a keyword for this CPG summary                               |
| ASHA. (n.d.). <i>Summary of the Clinical Practice Guideline - RCSLT Clinical Guidelines</i> . Retrieved October 29, 2017, from <a href="https://www.asha.org/articlesummary.aspx?id=8589960345">https://www.asha.org/articlesummary.aspx?id=8589960345</a>                                            | Multimodal treatment, used as a keyword for this CPG summary                               |
| Cahana-Amitay, D., & Albert, M. L. (2015a). Neuroscience of aphasia recovery: The concept of neural multifunctionality. <i>Current Neurology and Neuroscience Reports</i> , 15, 41. <a href="https://doi.org/10.1007/s11910-015-0568-7">https://doi.org/10.1007/s11910-015-0568-7</a>                 | Multimodal cueing                                                                          |
| Cahana-Amitay, D., & Albert, M. L. (2015b). <i>Redefining recovery from aphasia</i> . Oxford, United Kingdom: Oxford University Press. <a href="https://doi.org/10.1093/med/9780199811939.003.0009">https://doi.org/10.1093/med/9780199811939.003.0009</a>                                            | Multimodality aphasia treatment, multimodal cueing                                         |
| Centeno, J., & Ansaldo, A. (2013). Aphasia in multilingual populations. In I. Papathanasiou, P. Coppens, & C. Potagas (Eds.), <i>Aphasia and related neurogenic communication disorders</i> (pp. 275–293). Burlington, MA: Jones & Bartlett Publishers.                                               | Multimodality stimulation                                                                  |
| Cherney, L. R., & Robey, R. R. (2001). Aphasia treatment: Recovery, prognosis, and clinical effectiveness. In R. Chapey (Ed.), <i>Language interventions</i>                                                                                                                                          | Schuell-Wepman-Darley Multimodal-stimulation (SWDM)                                        |

|                                                                                                                                                                                                                                                                                                                                                                                                                                                                                                               |                                                     |
|---------------------------------------------------------------------------------------------------------------------------------------------------------------------------------------------------------------------------------------------------------------------------------------------------------------------------------------------------------------------------------------------------------------------------------------------------------------------------------------------------------------|-----------------------------------------------------|
| <i>strategies in aphasia and related neurogenic communication disorders</i> (4th ed., pp. 186–202). Baltimore, MD: Lippincott Williams & Wilkins.                                                                                                                                                                                                                                                                                                                                                             |                                                     |
| Duffy, J. R., & Coelho, C. A. (2001). Schuell’s stimulation approach to rehabilitation. In R. Chapey (Ed.), <i>Language interventions strategies in aphasia and related neurogenic communication disorders</i> (4th ed., pp. 341–379). Baltimore, MD: Lippincott Williams & Wilkins.                                                                                                                                                                                                                          | Multimodality stimulation                           |
| Fucetola, R., Holloran, S. M., Pratzel, J., Connor, L. T., & Tucker, F. (2011). <i>Innovation in evidence-based language treatment: 10-year report</i> [Presentation slides]. Presented at the Annual Convention of the American Speech-Language-Hearing Association, San Diego, CA. Retrieved from <a href="https://www.asha.org/Events/convention/handouts/2011/Fucetola-Holloran-Pratzel-Connor-Tucker/">https://www.asha.org/Events/convention/handouts/2011/Fucetola-Holloran-Pratzel-Connor-Tucker/</a> | Multimodal treatment                                |
| Hartley, M. L., Turry, A., & Raghavan, P. (2010). The role of music and music therapy in aphasia rehabilitation. <i>Music and Medicine</i> , 2(4), 235–242.                                                                                                                                                                                                                                                                                                                                                   | Multimodal approach                                 |
| Howard, D., Patterson, K., Franklin, S., Orchard-lisle, V., & Morton, J. (1985). The facilitation of picture naming in aphasia. <i>Cognitive Neuropsychology</i> , 2(1), 49–80. <a href="https://doi.org/10.1080/02643298508252861">https://doi.org/10.1080/02643298508252861</a>                                                                                                                                                                                                                             | Multimodal approach<br>Multimodal therapy           |
| Huber, W., Springer, L., & Willmes, K. (1993). Approaches to aphasia therapy in Aachen. In A. Holland & M. Forbes (Eds.), <i>Aphasia treatment: World perspectives</i> (pp. 55–86). San Diego, CA: Singular.                                                                                                                                                                                                                                                                                                  | Multimodal stimulation                              |
| Jakab, I. (1985). Nonverbal expression and congenital aphasia. In P. Pichot, P. Berner, R. Wolf, & K. Thau (Eds.), <i>Clinical psychopathology nomenclature and classification</i> (pp. 1029–1037). New York, NY: Springer.                                                                                                                                                                                                                                                                                   | Multimodality treatment                             |
| Katz, R. C. (2001). Computer applications in aphasia treatment. In R. Chapey (Ed.), <i>Language interventions strategies in aphasia and related neurogenic communication disorders</i> (4th ed., pp. 852–877). Baltimore, MD: Lippincott Williams & Wilkins.                                                                                                                                                                                                                                                  | Multi-modal treatment                               |
| Kearns, K. P., & Simmons, N. (1985). <i>Group therapy for aphasia: A survey of VA medical centres</i> . Presented at the Clinical Aphasiology Conference,                                                                                                                                                                                                                                                                                                                                                     | Multimodality stimulation<br>Multimodal stimulation |

|                                                                                                                                                                                                                                                                                                                                                              |                                                                                                                 |
|--------------------------------------------------------------------------------------------------------------------------------------------------------------------------------------------------------------------------------------------------------------------------------------------------------------------------------------------------------------|-----------------------------------------------------------------------------------------------------------------|
| Ashland, OR. Retrieved from <a href="http://eprints-prod-05.library.pitt.edu/851/1/15-22.pdf">http://eprints-prod-05.library.pitt.edu/851/1/15-22.pdf</a>                                                                                                                                                                                                    |                                                                                                                 |
| Koul, R., & Corwin, M. (2011). The process of evidence-based practice: Informing AAC clinical decisions for persons with aphasia. In R. Koul (Ed.), <i>Augmentative and alternative communication for adults with aphasia: science and clinical practice</i> (pp. 155–164). Bingley, UK: Emerald.                                                            | Multimodal treatment package                                                                                    |
| Madden, E. B., Robinson, R. M., & Kendall, D. L. (2017). Phonological treatment approaches for spoken word production in aphasia. <i>Seminars in Speech and Language, 38</i> (1), 62–74. <a href="https://doi.org/10.1055/s-0036-1597258">https://doi.org/10.1055/s-0036-1597258</a>                                                                         | Multimodal training                                                                                             |
| Morganstein, S., & Certner-Smith, M. (2001). Thematic language-stimulation therapy. In R. Chapey (Ed.), <i>Language interventions strategies in aphasia and related neurogenic communication disorders</i> (4th ed., pp. 450–468). Baltimore, MD: Lipincott Williams & Wilkins.                                                                              | Multimodality stimulation                                                                                       |
| Murray, L., & Coppens, P. (2013). Formal and informal assessment of aphasia. In I. Papathanasiou, P. Coppens, & C. Potagas (Eds.), <i>Aphasia and related neurogenic communication disorders</i> (pp. 67–91). Burlington, MA: Jones & Bartlett Publishers.                                                                                                   | Multimodal cue                                                                                                  |
| Pierce, J. E., Menahemi-Falkov, M., O’Halloran, R., Togher, L., & Rose, M. L. (2017). Constraint and multimodal approaches to therapy for chronic aphasia: A systematic review and meta-analysis. <i>Neuropsychological Rehabilitation, 1</i> –37. <a href="https://doi.org/10.1080/09602011.2017.1365730">https://doi.org/10.1080/09602011.2017.1365730</a> | Multimodal approaches<br>Multimodal therapy<br>Multimodal treatment<br>Multimodal cueing<br>Multimodal training |
| Purdy, M., & Dietz, A. (2010). Acquired communication disorders and cognitive deficits: AAC intervention challenges. <i>Perspectives on Augmentative and Alternative Communication, 19</i> (3), 62–10. <a href="https://doi.org/10.1044/aac19.3.62">https://doi.org/10.1044/aac19.3.62</a>                                                                   | Multimodality Communication Training Program                                                                    |
| Robey, R. R. (1994). The efficacy of treatment for aphasic persons: A meta-analysis. <i>Brain and Language, 47</i> (4), 582–608. <a href="https://doi.org/10.1006/brln.1994.1060">https://doi.org/10.1006/brln.1994.1060</a>                                                                                                                                 | Multimodal stimulus/response                                                                                    |

|                                                                                                                                                                                                                                                                                                                                                                                                                             |                                                                                                                                                                     |
|-----------------------------------------------------------------------------------------------------------------------------------------------------------------------------------------------------------------------------------------------------------------------------------------------------------------------------------------------------------------------------------------------------------------------------|---------------------------------------------------------------------------------------------------------------------------------------------------------------------|
| <p>Robey, R. R. (1998). A meta-analysis of clinical outcomes in the treatment of aphasia. <i>Journal of Speech, Language, and Hearing Research</i>, 41(1), 172–16. <a href="https://doi.org/10.1044/jslhr.4101.172">https://doi.org/10.1044/jslhr.4101.172</a></p>                                                                                                                                                          | <p>Multimodality stimulation hierarchies<br/>Schuell-Wepman-Darley Multimodal-stimulation (SWDM)</p>                                                                |
| <p>Rose, M. L. (2013). Releasing the constraints on aphasia therapy: The positive impact of gesture and multimodality treatments. <i>American Journal of Speech-Language Pathology</i>, 22(2), S227–39. <a href="https://doi.org/10.1044/1058-0360(2012/12-0091)">https://doi.org/10.1044/1058-0360(2012/12-0091)</a></p>                                                                                                   | <p>Multimodality treatments</p>                                                                                                                                     |
| <p>Rose, M. L., Raymer, A. M., Lanyon, L. E., &amp; Attard, M. C. (2013b). A systematic review of gesture treatments for post-stroke aphasia. <i>Aphasiology</i>, 27(9), 1090–1127. <a href="https://doi.org/10.1080/02687038.2013.805726">https://doi.org/10.1080/02687038.2013.805726</a></p>                                                                                                                             | <p>Multimodal treatments<br/>Multimodality treatment approaches<br/>Multimodality Aphasia Therapy<br/>Multimodality aphasia training<br/>Multimodality training</p> |
| <p>Stark, J. A. (2010, November 14). <i>Reinventing the wheel? On the history of aphasia therapy</i>. Poster presented at the Annual Convention of the American Speech-Language-Hearing Association Conference, Philadelphia, PA.</p>                                                                                                                                                                                       | <p>Multimodality approach<br/>Multimodal approach</p>                                                                                                               |
| <p>Wallace, S. (2013, September 1). More than words. <i>The ASHA Leader</i>, 40–45. <a href="https://doi.org/10.1044/leader.FTR1.18092013.40">https://doi.org/10.1044/leader.FTR1.18092013.40</a></p>                                                                                                                                                                                                                       | <p>Multimodal strategies<br/>Multimodal Communication Treatment<br/>Multimodal treatment</p>                                                                        |
| <p>Wertz, R. T. (2003). Efficacy of aphasia therapy, Escher, and Sisyphus. In I. Papathanasiou &amp; R. de Bleser (Eds.), <i>The sciences of aphasia: From therapy to theory</i> (pp. 259–272). Oxford, United Kingdom: Pergamon.</p>                                                                                                                                                                                       | <p>Multimodality stimulation</p>                                                                                                                                    |
| <p>Williamson, D. S., Richman, M., &amp; Redmond, S. C. (2010, November). <i>Group treatment for aphasia based on a hierarchical framework</i>. Presented at the Annual Convention of the American Speech-Language-Hearing Association. Retrieved from <a href="http://www.asha.org/Events/convention/handouts/2010/1685-Williamson-Darlene/">www.asha.org/Events/convention/handouts/2010/1685-Williamson-Darlene/</a></p> | <p>Multi-modal approach</p>                                                                                                                                         |
